# Supplementary material for: The Treatment of Keloid Scars via Modulating Heterogeneous Gelatin-Structured Composite Microneedles to Control Transdermal Dual-Drug Release
Source: MDPI journal article supplement (doi:10.3390/polym14204436), 2022-10-20
Supplement: s1 [file s1]

## Supplementary data

**Table S1.** Primers used in this study.

| Marker gene                    |         | Sequences (5'-3')          | Accession No. |
|--------------------------------|---------|----------------------------|---------------|
| <i>Gapdh</i>                   | Forward | GACTCCACTCACGGCAAATTCAAC   | XM_036165840  |
|                                | Reverse | GTCGTGGAGTCTACTGGTGTCTTCAC |               |
| <i>Col I</i>                   | Forward | CCCAGTGGCGGTTATGACTTCA     | NM_007742     |
|                                | Reverse | CACCACCCTCAAGAGCCTGAGT     |               |
| <i>TGF-<math>\beta</math>1</i> | Forward | GAGCCACTGCCCATCGTCTACTAC   | NM_011577     |
|                                | Reverse | GCTACCATGCCAACTTCTGTCTGG   |               |
| <i>Col III</i>                 | Forward | TTCATGAAGATGACCGACGA       | NM_009930     |
|                                | Reverse | GTCCAGTCGTAGCCCTTGAG       |               |
| <i>TIMP-1</i>                  | Forward | CCTTCTGCAACTCGGACCTGGTC    | NM_001044384  |
|                                | Reverse | GCTATCACTGATAGCTTCCAG      |               |
| <i>MMP-2</i>                   | Forward | GAGCATGGAGATGGATACC        | NM_008610     |
|                                | Reverse | GTATGGAGCGACGTCACTCC       |               |

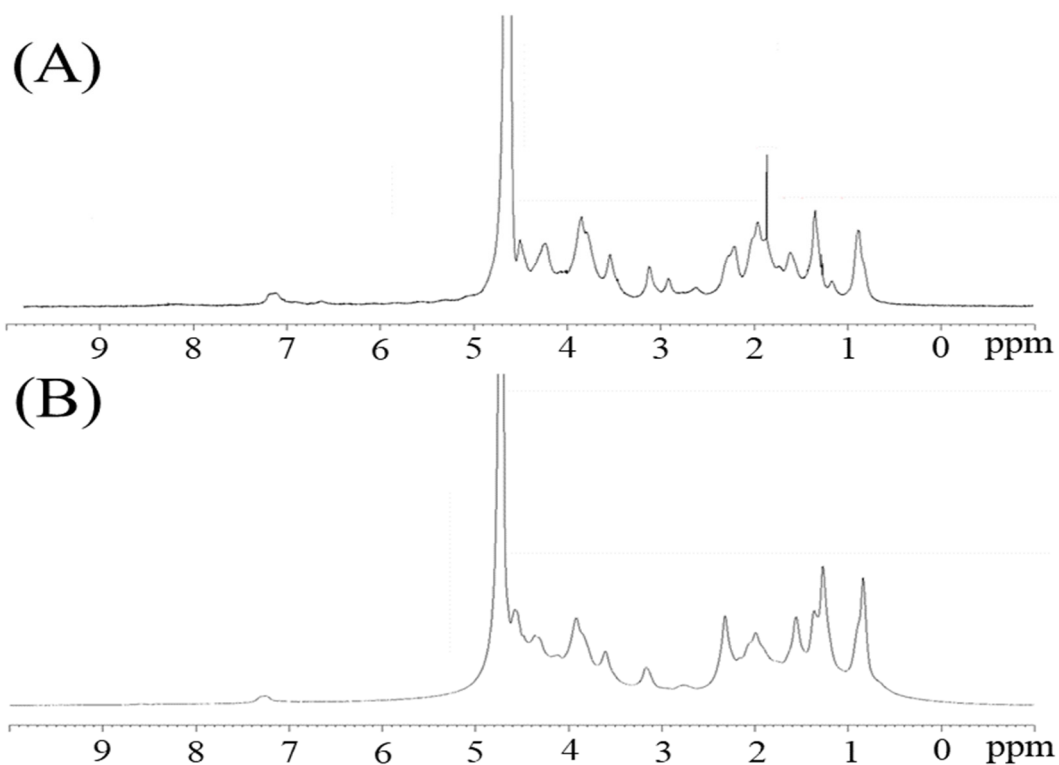

**Figure S1.** <sup>1</sup>H-NMR spectrum of gelatin molecules in D<sub>2</sub>O: (A) primitive and (B) modified gelatin molecules.

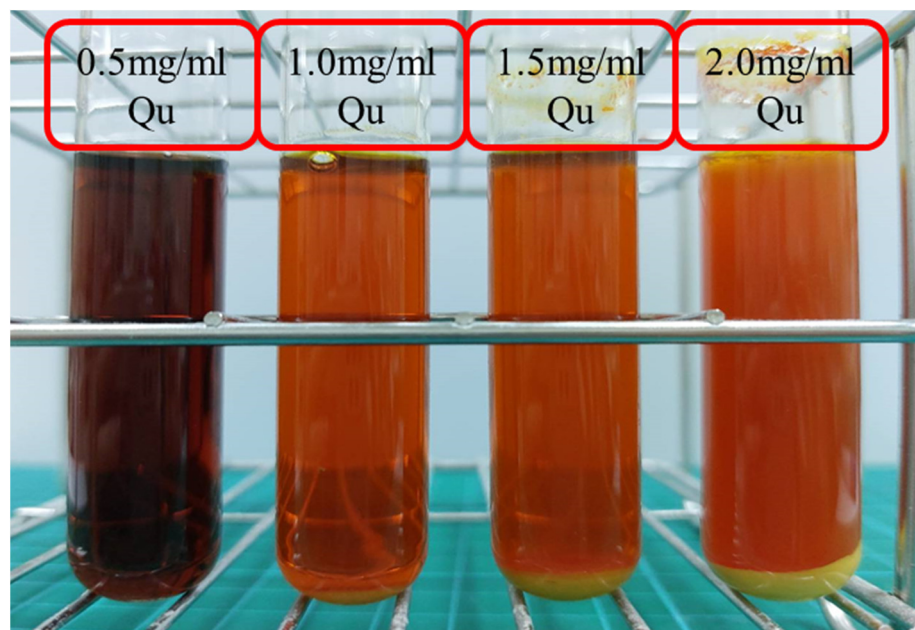

**Figure S2.** Appearance of QAGN with loading different concentrations of quercetin, in deionized water.

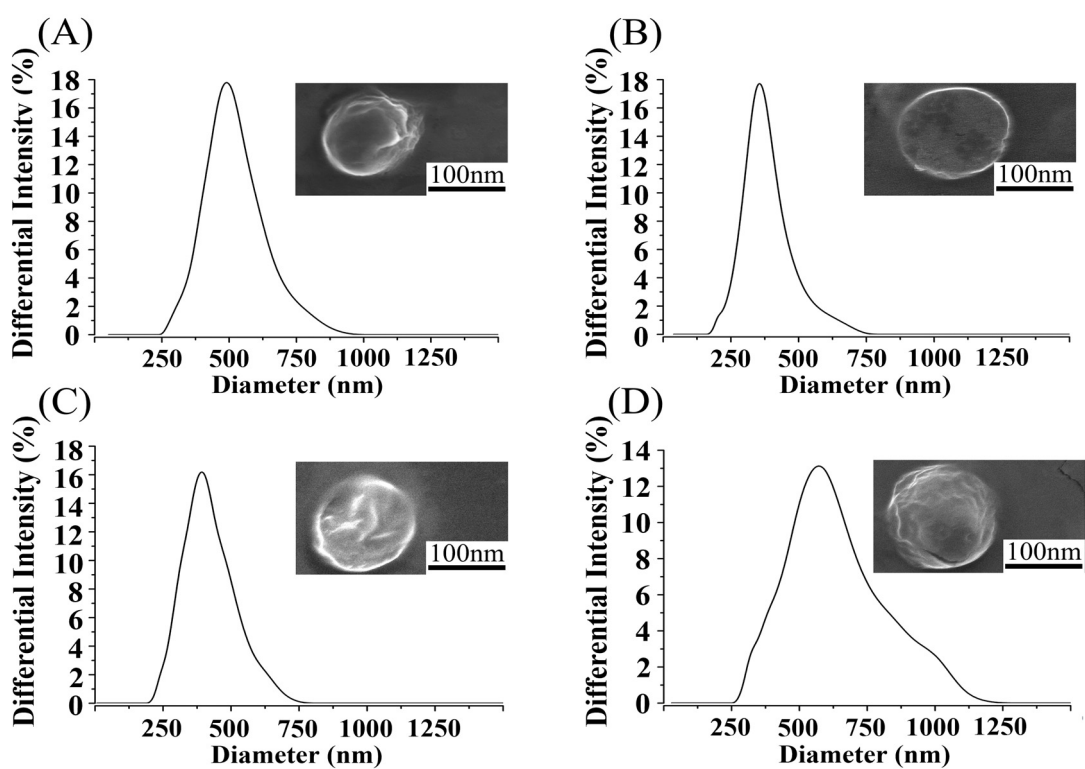

**Figure S3.** Particle size and SEM image of QAGNs with various concentrations of quercetin. (A) 0.5mg/ml quercetin loaded QAGNs; (B) 1mg/ml quercetin loaded QAGNs; (C) 1.5mg/ml quercetin loaded QAGNs; (D) quercetin loaded QAGNs.

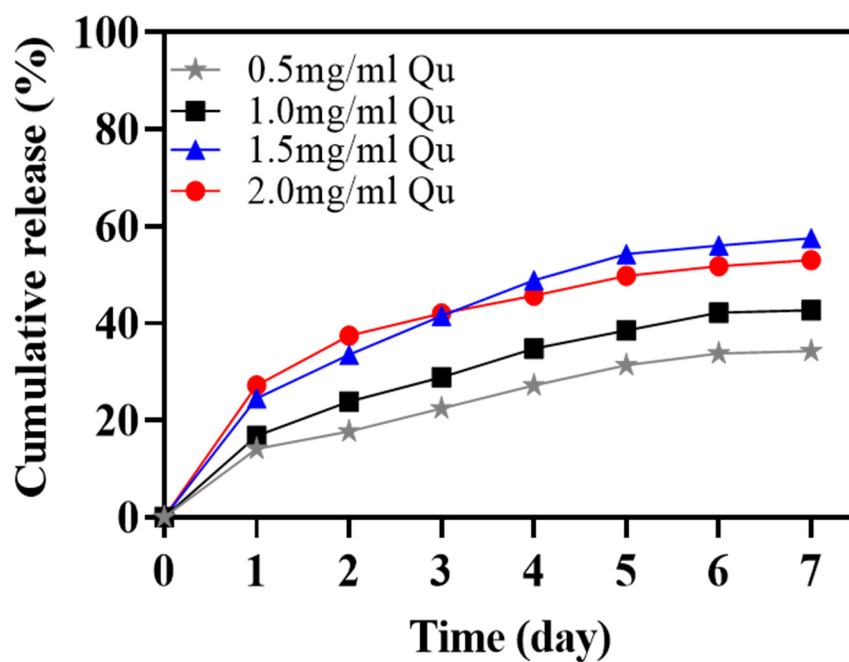

Figure S4. Drug releasing profiles of Qu in QAGNs.

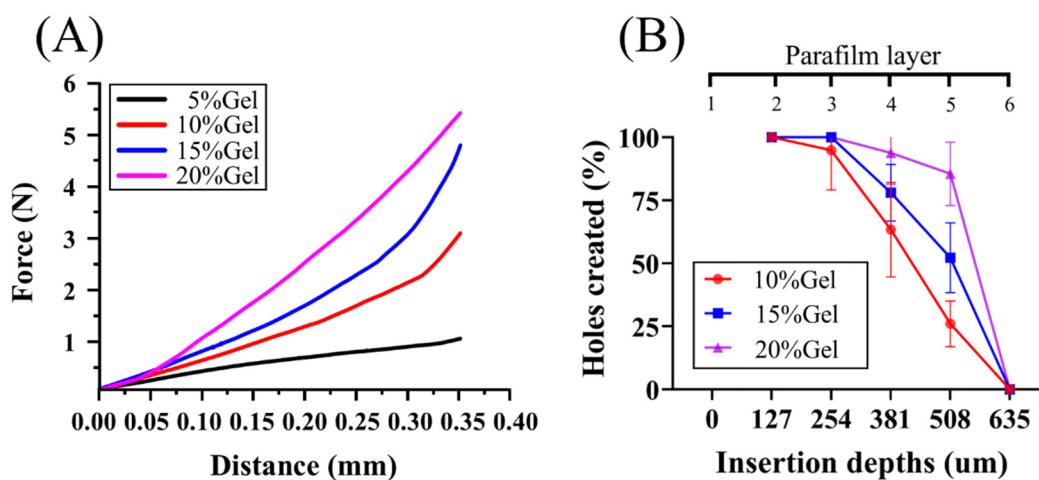

Figure S5. (A) Mechanical properties analysis of composite MN patches with various concentrations of gelatin; (B) Insertion in parafilm.
